# Supplementary material for: High Temperature Acoustic Liner Technology
Source: Oxford University Press journal article supplement (doi:10.1158/1535-7163.mct-19-0536), 1999-09-01
Supplement: 15357163mct190536-sup-222744_3_supp_5819225_pyyw33.docx [file 15357163mct190536-sup-222744_3_supp_5819225_pyyw33.docx]

**Supplementary Table S1.** Anti-proliferating effects of VERU-111 against various human cancer cell lines (mean ± SEM, n = 4 biological replicate experiments).

| **Tumor type** | **Cell line** | **IC50 ± SEM [nM]** |
| --- | --- | --- |
| **Melanoma** | M14 | 8.86 ± 1.97 |
| RPMI7951 | 8.76 ± 2.24 |
| **Breast** | MDA-MB-453 | 13.59 ± 2.42 |
| SKBR3 | 13.29 ± 1.41 |
| MDA-MB-231 | 8.23 ± 2.39 |
| MDA-MB-468 | 9.40 ± 2.36 |
